# Supplementary material for: What can hydrological modelling gain from spatially explicit parameterization and multi-gauge calibration?
Source: Copernicus journal article supplement (doi:10.5194/egusphere-2025-6543), 2026-02-02
Supplement: Supplementary file 1 [file egusphere-2025-6543-supplement.pdf]

## *Supplement of*

# **What can hydrological modelling gain from spatially explicit parameterization and multi-gauge calibration?**

Xudong Zheng<sup>1</sup>, Dengfeng Liu<sup>1\*</sup>, Hao Wang<sup>2</sup>, Chuanhui Ma<sup>1</sup>, Hui Liu<sup>2</sup>, Guanghui Ming<sup>3</sup>, Qiang Li<sup>4</sup>,  
5 Mohd Yawar Ali Khan<sup>5</sup>, Fiaz Hussain<sup>6</sup>

<sup>1</sup>State Key Laboratory of Water Engineering Ecology and Environment in Arid Area, School of Water Resources and Hydropower, Xi'an University of Technology, Xi'an, 710048, China

<sup>2</sup>State Key Laboratory of Water Cycle and Water Security, China Institute of Water Resources and Research, Beijing, 100038, China

10 <sup>3</sup>Key Laboratory of Water Management and Water Security for Yellow River Basin (Ministry of Water Resources), Yellow River Engineering Consulting Co., Ltd., Zhengzhou 450003, China

<sup>4</sup>State Key Laboratory of Soil and Water Conservation and Desertification Control, College of Forestry, Northwest A&F University, Yangling 712100, China

<sup>5</sup>Department of Hydrogeology, Faculty of Earth Sciences, King Abdulaziz University, Jeddah 21589, Saudi Arabia

15 <sup>6</sup>Department of Land and Water Conservation Engineering, Faculty of Agricultural Engineering and Technology, PMAS-Arid Agriculture University Rawalpindi, Rawalpindi 46300, Pakistan

*Correspondence to:* Dengfeng Liu ([liudf@xaut.edu.cn](mailto:liudf@xaut.edu.cn))

**Table S1. Performance comparison of Cases 3, 2, and 4 during the validation period, with runoff generation parameters held constant as in Case 4. Performance is quantified by the KGE metrics, with the best value for each sub-basin shown in bold.**

|        | Hanzhong     | Yangxian     | Youshui      | Lianghekou   | Shiquan      |
|--------|--------------|--------------|--------------|--------------|--------------|
| Case 3 | 0.494        | 0.632        | 0.376        | 0.589        | 0.672        |
| Case 2 | 0.492        | 0.630        | 0.372        | 0.582        | 0.670        |
| Case 4 | <b>0.521</b> | <b>0.637</b> | <b>0.446</b> | <b>0.730</b> | <b>0.689</b> |

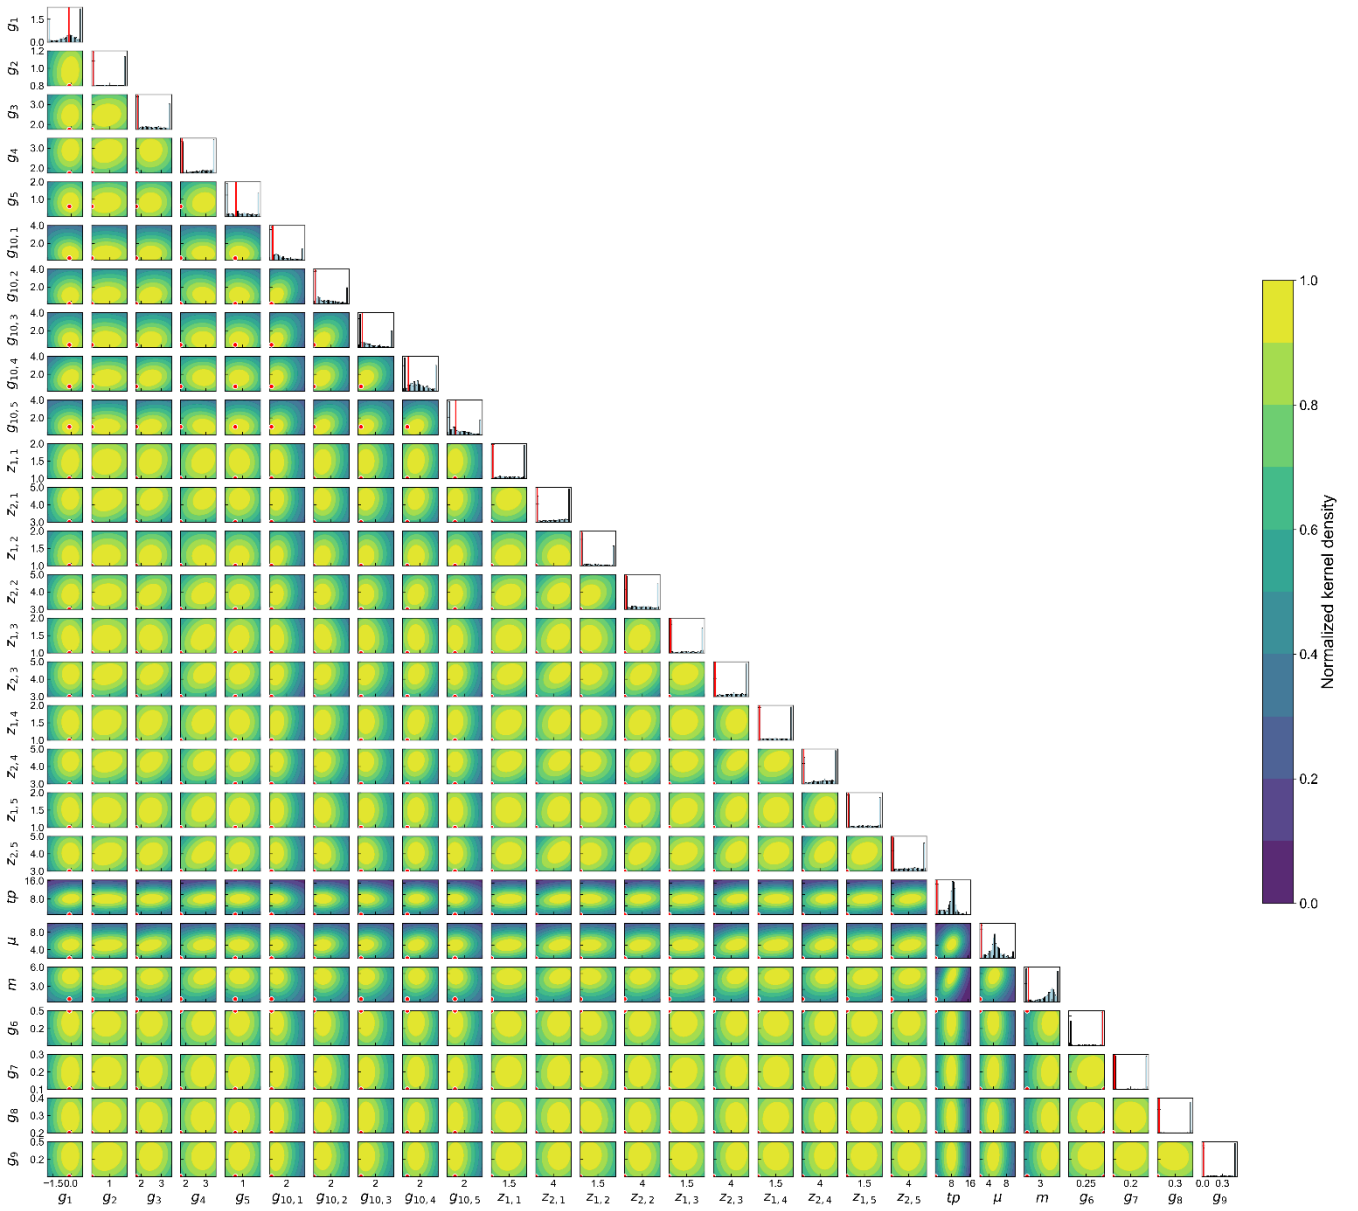

**Figure S1.** Post-calibration parameter distributions for Case 8. The optimal parameters are shown as red dots and lines. The background contours represent the standardized kernel density estimate derived from all candidate solutions, where yellow shading corresponds to high probability density regions. The histograms along the diagonal represent the marginal distribution of each individual parameter.

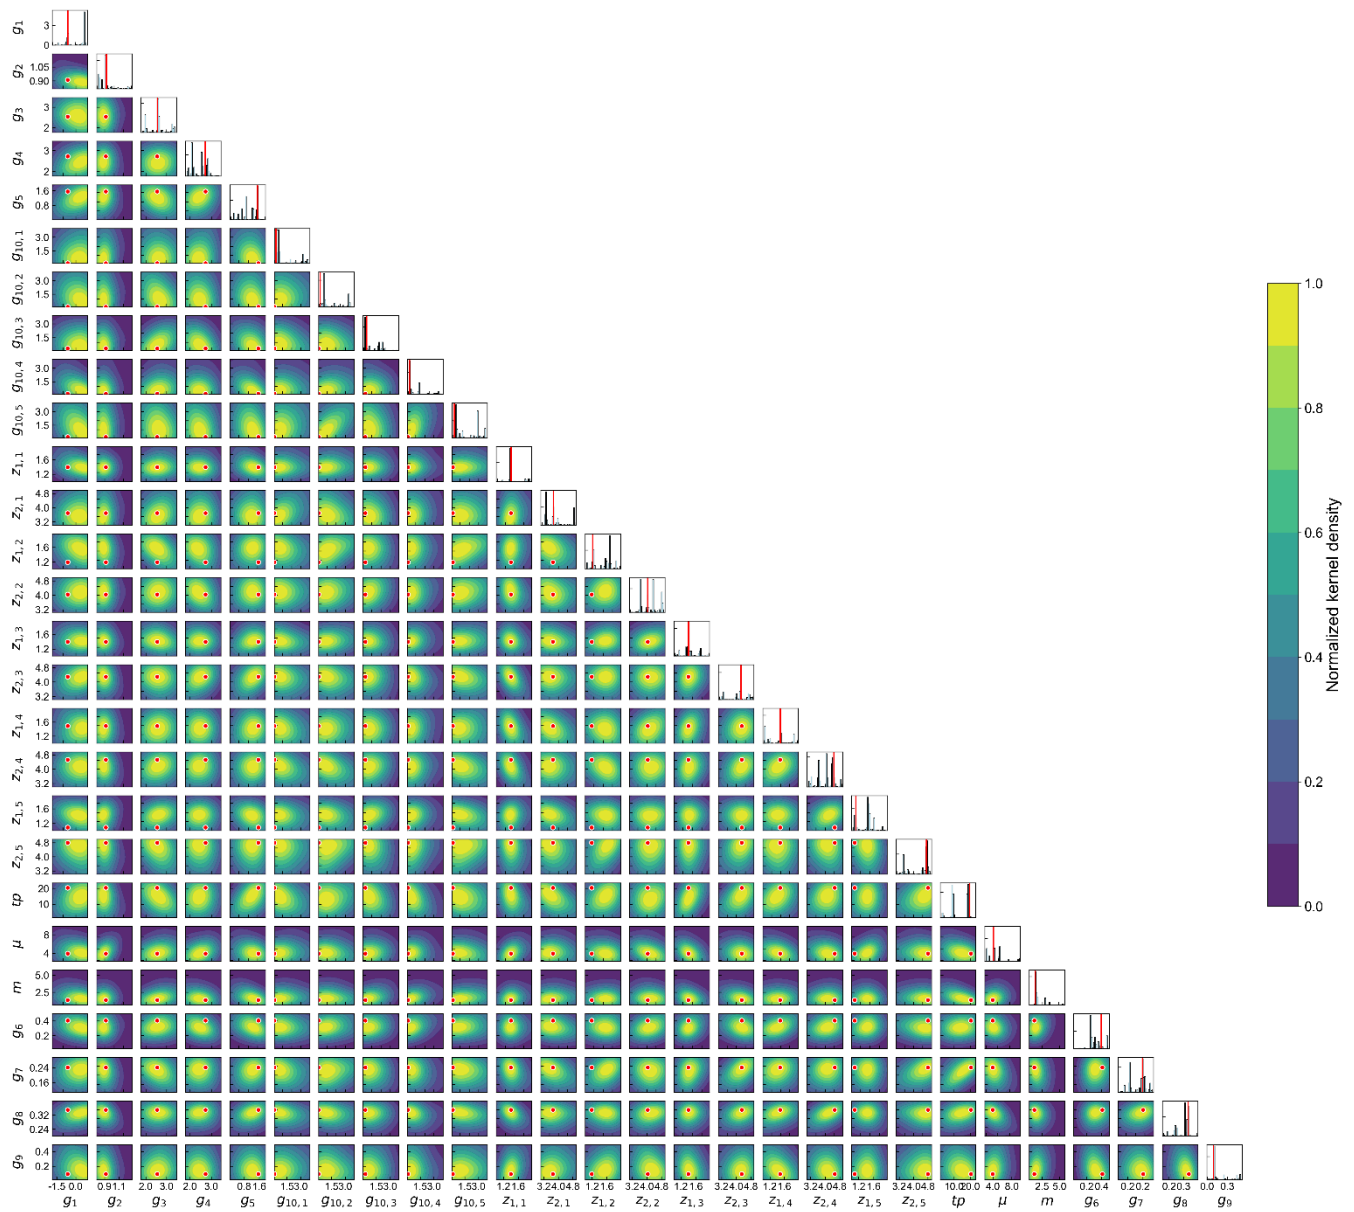

**Figure S2.** Post-calibration parameter distributions for Case 5, following the same visualization conventions as Fig. S1. While the overall structure is similar, Case 1 exhibits more concentrated posterior distributions and different optimal values.

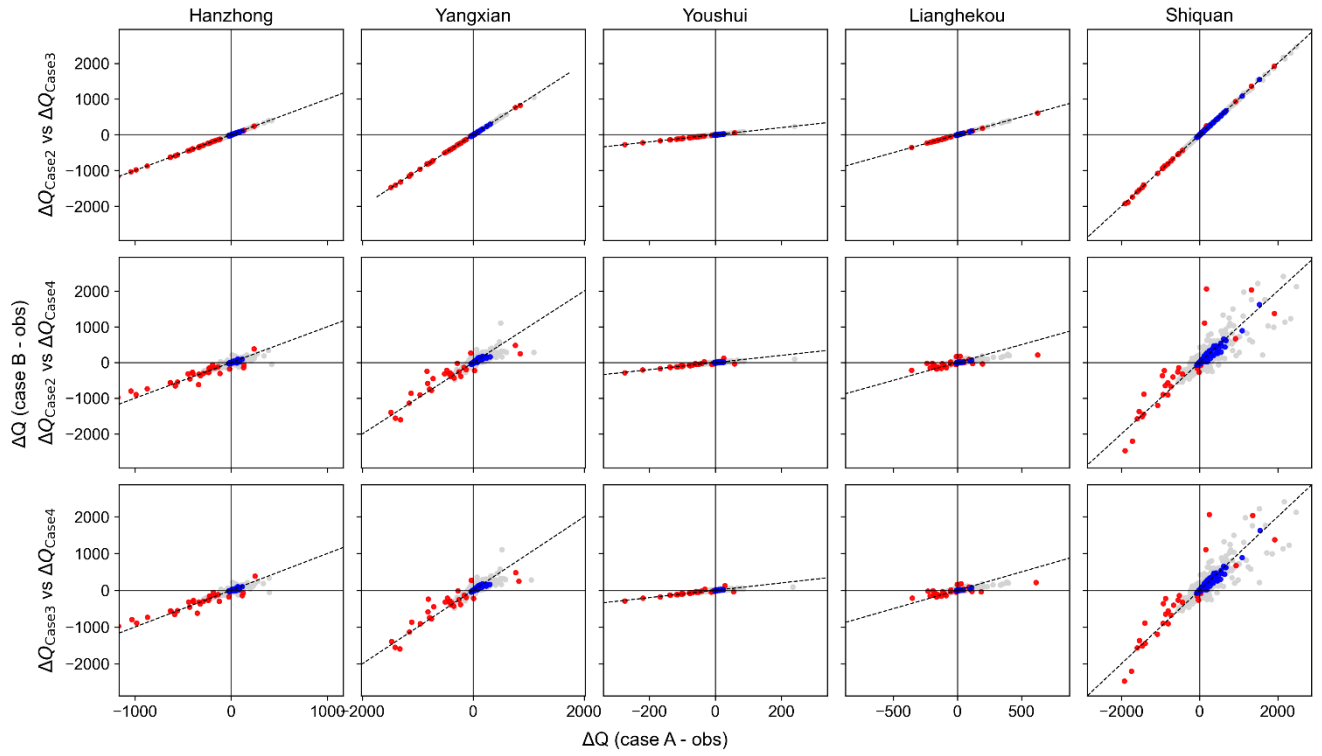

**Figure S3. Scatter plots of simulated residuals ( $\Delta Q$ ) for Cases 3, 2, and 4 during the validation period, using the runoff generation parameters from Case 4. Red and blue dots represent high flows (exceedance probability < 2%) and low flows (exceedance probability > 70%), respectively. The dashed line indicates the 1:1 line.**
